# Supplementary material
Source: MDPI journal article supplement (https://www.mdpi.com/2072-4292/12/3/488)
Supplement: s1 [file s1]

## Supplementary materials

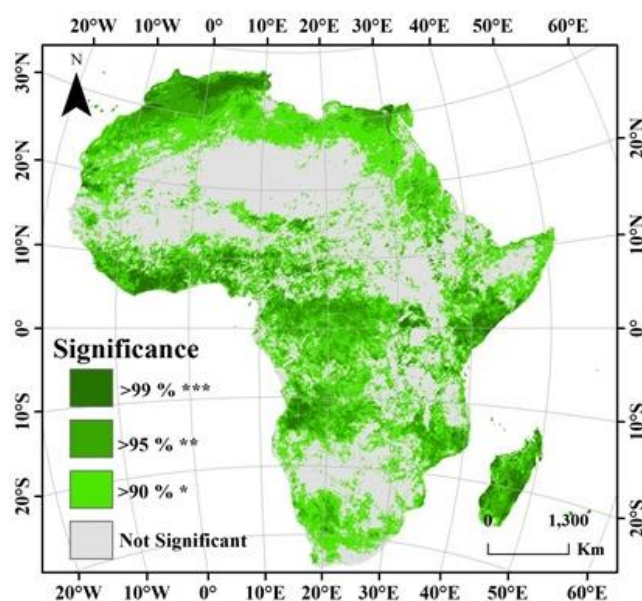

**Figure S1.** Significance of the spatial distribution of annual LST trends in Africa from 2003 to 2017. The symbols \*\*\*, \*\*, and \* represent significant warming/cooling trends at the 99%, 95% and 90% confidence levels based on an independent-samples t-test, respectively (same as below).

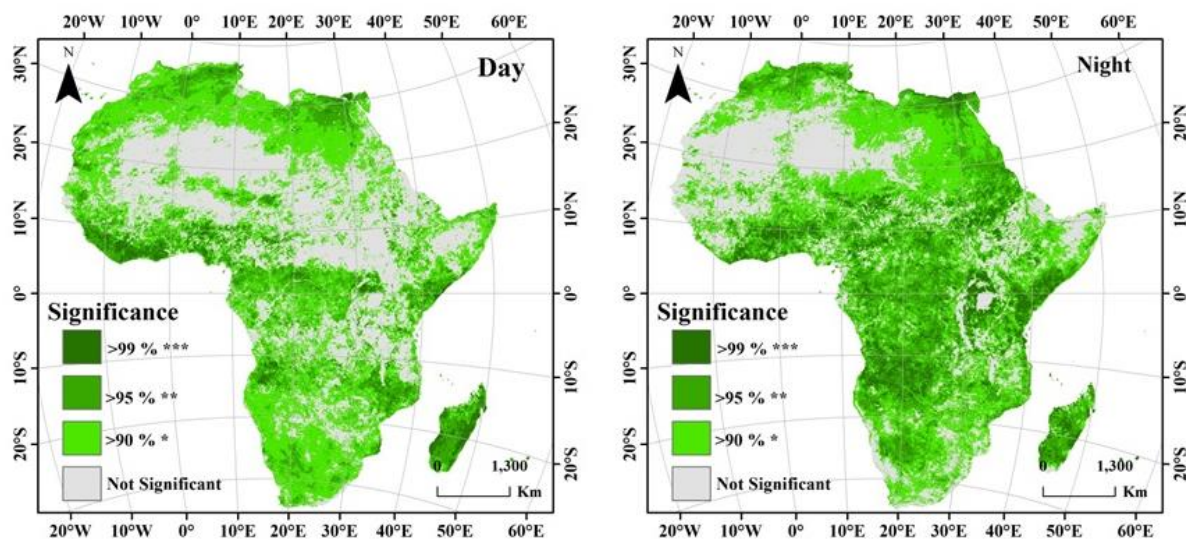

**Figure S2.** Spatial dynamics of the significant diurnal variations in diurnal LST change from 2003 to 2017.

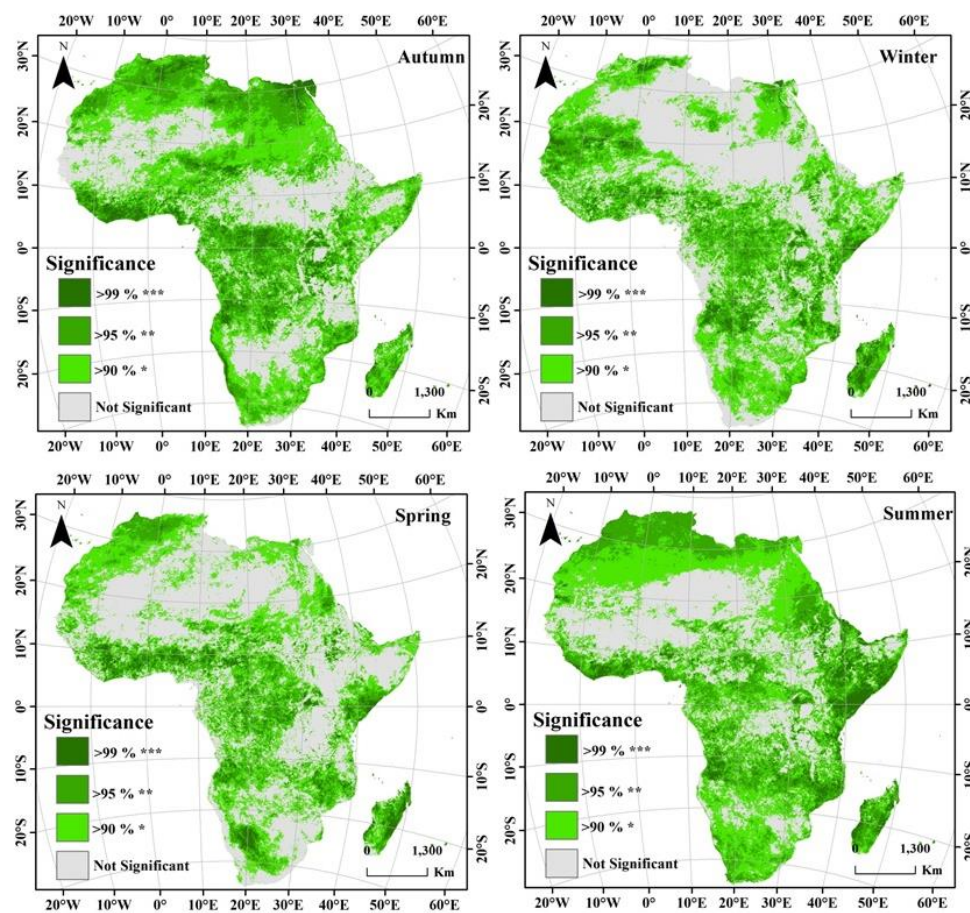

**Figure S3.** Significance of the spatial distribution of seasonal LST trends from 2003 to 2017.

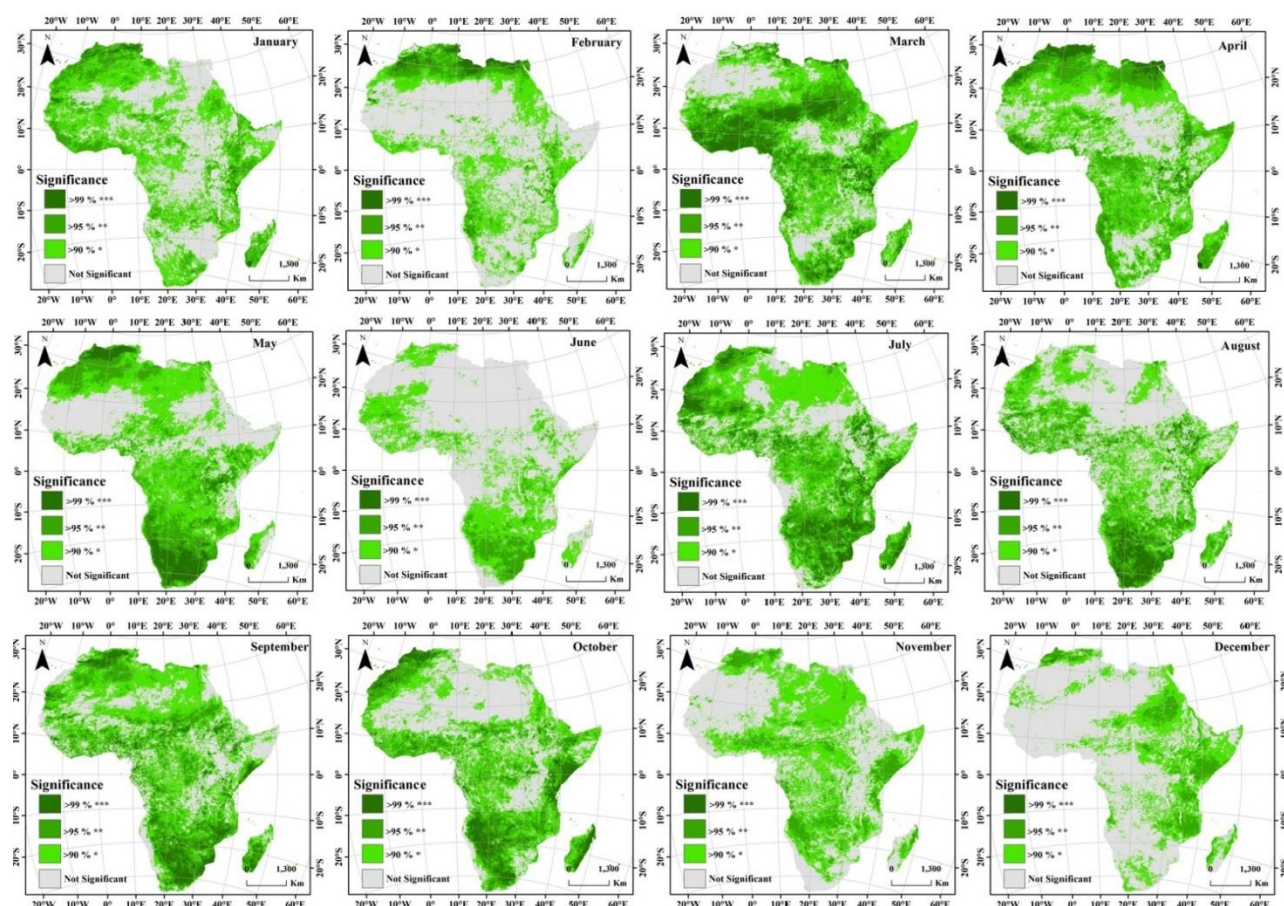

**Figure S4.** Significance of the spatial distribution of monthly LST trends in Africa from 2003 to 2017.
